# Supplementary material for: Pan-African phylogeny of Mus (subgenus Nannomys) reveals one of the most successful mammal radiations in Africa
Source: PubMed Central journal article supplement (PMC4280006; doi:10.1186/s12862-014-0256-2), 2014-12-14

**Additional File 2: List of sequences used for divergence dating and resulting fossil-calibrated time-tree.**

**Supplementary Table:** Data set used for the divergence dating analysis in BEAST. GenBank accession codes for *IRBP* and *CYTB* sequences are shown, as well as ID of the voucher specimens (when available).

| <b>Taxon</b>                  | <b>IRBP</b> | <b>CYTB</b> | <b>Voucher (IRBP/CYTB)</b>    |
|-------------------------------|-------------|-------------|-------------------------------|
| <i>Aethomys</i>               | AY326075    | AJ604526    | FMNH168101/TZ337              |
| <i>Apodemus agrarius</i>      | AB096842    | AB096809    | HS1733                        |
| <i>Apodemus argenteus</i>     | AB032855    | AB032848    | HS361                         |
| <i>Apodemus draco</i>         | AB109398    | AB109397    | KIZ211058                     |
| <i>Apodemus flavicollis</i>   | AB032860    | AB032853    | HS591                         |
| <i>Apodemus gorkha</i>        | AB032859    | AB032852    | HS1317                        |
| <i>Apodemus latronum</i>      | AB096851    | AB096834    | HS2515                        |
| <i>Apodemus mystacinus</i>    | AB303229    | AJ748237    | MAS2/JRM-544                  |
| <i>Apodemus speciosus</i>     | AB032856    | AB032849    | HS240                         |
| <i>Apodemus witherbyi</i>     | AB303231    | AB303228    | Her103                        |
| <i>Arvicanthis neumanni</i>   | KC953358    | EU349737    | H 894                         |
| <i>Arvicanthis niloticus</i>  | DQ022386    | AF004569    | MNHN 1997-1842                |
| <i>Colomys</i>                | DQ022395    | AF518372    | SMNS 30124                    |
| <i>Dasymys</i>                | EU292143    | AF141217    | ?                             |
| <i>Golunda</i>                | AM408332    | AM408338    | T-843                         |
| <i>Grammomys</i>              | AM408329    | AM408345    | T-1092                        |
| <i>Heimyscus</i>              | DQ022397    | AF518332    | MNHN 2001-64                  |
| <i>Hylomyscus parvus</i>      | DQ022399    | AF518329    | CM SP_10502                   |
| <i>Hylomyscus stella</i>      | DQ022398    | AF518331    | CM SP_5032                    |
| <i>Lemniscomys rosalia</i>    | DQ022390    | AF141209    | MNHN 1996-569/?               |
| <i>Lemniscomys striatus</i>   | AM408321    | AF141210    | T-789/?                       |
| <i>Malacomys edwardsi</i>     | DQ022392    | DQ022379    | R24689                        |
| <i>Malacomys longipes</i>     | DQ022393    | DQ022380    | MNHN_2001-070                 |
| <i>Mastomys coucha</i>        | DQ022400    | AF518334    | MNHN 1999-104                 |
| <i>Mastomys erythroleucus</i> | AM408335    | AM409395    | T-295/M4912                   |
| <i>Mastomys pernanus</i>      | DQ022403    | AF518343    | RUCA 1624                     |
| <i>Micaelamys</i>             | AM408330    | AF141215    | T-1425/?                      |
| <i>Mus cookii</i>             | AB125802    | AB125767    | HS2921                        |
| <i>Mus musculus</i>           | AF126968    | V00711      |                               |
| <i>Mus pahari</i>             | AJ698893    | AY057814    |                               |
| <i>Mus crociduroides</i>      | AJ698894    | AJ698878    | T-1194                        |
| <i>Mus platythrix</i>         | AJ698895    | AJ698880    | T-406                         |
| <i>Myomyscus brockmani</i>    | DQ022407    | AF518352    | CM TK_33059                   |
| <i>Myomyscus yemeni</i>       | DQ022409    | AF518356    | MNHN 1994-079                 |
| <i>Oenomys</i>                | KC953425    | EU349769    | CM_102549/CM_102548           |
| <i>Otomys angoniensis</i>     | AM408325    | AM408343    | T-718                         |
| <i>Otomys denti</i>           | KC953428    | EU874449    | FMNH_138124                   |
| <i>Parotomys</i>              | KC953432    | AF141224    | H-656/?                       |
| <i>Praomys daltoni</i>        | DQ022406    | AF518348    | MNHN 1999-392                 |
| <i>Praomys degraafi</i>       | DQ022410    | AF518359    | FMNH 138046/FMNH 157790       |
| <i>Praomys delectorum</i>     | AY326104    | KC261544    | FMNH153977/RMCA 96.037-M-4755 |
| <i>Praomys jacksoni</i>       | KC953443    | EU349778    | CM 102583                     |
| <i>Praomys petteri</i>        | JF284269    | JQ735842    | MNHN R13072                   |
| <i>Praomys tullbergi</i>      | DQ022413    | AF518365    | CM SP10188                    |
| <i>Praomys verschureni</i>    | DQ022394    | AF518373    | SMNS 131                      |

|                                    |          |          |                               |
|------------------------------------|----------|----------|-------------------------------|
| <i>Stenocephalemys albipes</i>     | DQ022404 | AF518346 | MNHN 1999-561                 |
| <i>Stenocephalemys albicaudata</i> | DQ022414 | AF518369 | T-1590                        |
| <i>Stochomys</i>                   | EU292147 | EU292149 | MNHN 1999-459                 |
| <i>Tokudaia</i>                    | AB033712 | AB033703 | HS1162                        |
| <i>Zelotomys</i>                   | DQ022396 | AF518375 | A. Hoffman 3191               |
| MOTU 1 ("Nyika")                   | KJ935874 | KJ935741 | M8_3025_Nyika_MW              |
| MOTU 2 ( <i>imberbis</i> )         | KF928334 | KF928333 | ETH121_Chilalo_ETH_imberbis   |
| MOTU 3 ("Harena")                  | KJ935875 | KJ935743 | ETH211_HarenaForest_ETH       |
| MOTU 4 ( <i>triton</i> )           | KJ935748 | KJ935876 | KE913_Nanyuki_KE              |
| MOTU 7 (cf. <i>proconodon</i> )    | KJ935883 | KJ935767 | ETH299_MagoNP_ETH             |
| MOTU 8 ( <i>setulosus</i> )        | AJ698888 | AJ698873 | AJ698873_GAB_setulosus        |
| MOTU 12 ( <i>baoulei</i> )         | -        | EU603991 | BE55_Agbassa_BE               |
| MOTU 17 ( <i>neavei</i> )          | KJ935890 | KJ935805 | M8_3049_Nyika_MW              |
| MOTU 18 ("Zakouma")                | AJ875089 | AJ875085 | AJ875085_Zakouma_TCH          |
| MOTU 19 ( <i>haussa</i> )          | AJ875073 | AJ698891 | AJ875073_Kollo_NIG_haussa     |
| MOTU 22 ( <i>indutus</i> )         | AJ698892 | AJ698874 | AJ698874_Kgalagadi_SA_indutus |
| MOTU 23 (cf. <i>gratus</i> )       | KJ935894 | KJ935822 | TA77_Minziro_TZ               |
| MOTU 27 ( <i>minutoides</i> )      | KJ935903 | KJ935867 | TA171_Rumanyika_TZ            |

---

**Supplementary Figure:** Dating of divergences of murine rodents using relaxed clock model with substitution rates drawn from an uncorrelated lognormal distribution in BEAST 1.8.0 (Drummond et al., 2012) and three fossil-based calibration points (marked by stars).

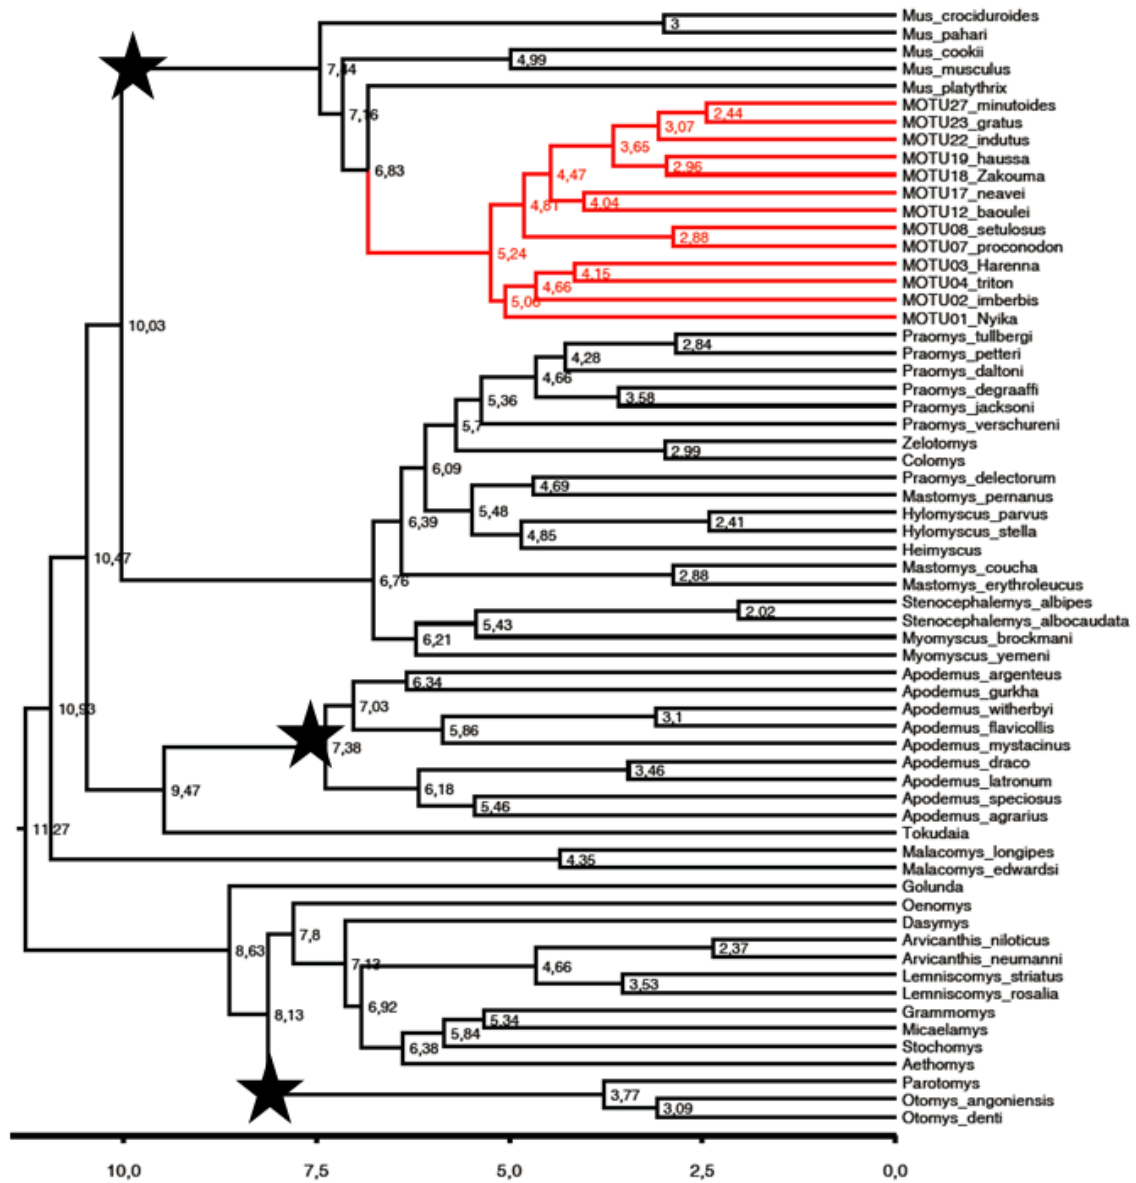

Supplement: 12862_2014_256_MOESM2_ESM.pdf [file 12862_2014_256_MOESM2_ESM.pdf]
