# Supplementary material for: Pan-African phylogeny of Mus (subgenus Nannomys) reveals one of the most successful mammal radiations in Africa
Source: PubMed Central journal article supplement (PMC4280006; doi:10.1186/s12862-014-0256-2), 2014-12-14

Bryja et al., **Additional file 3:** Maximum likelihood phylogeny of *Nannomys* based on separate analyses of (A) mitochondrial CYTB and (B) nuclear IRBP genes. Significance of nodes was tested by 1000 bootstraps; only bootstrap values > 75% are shown.

(A) ML tree of *CYTB*

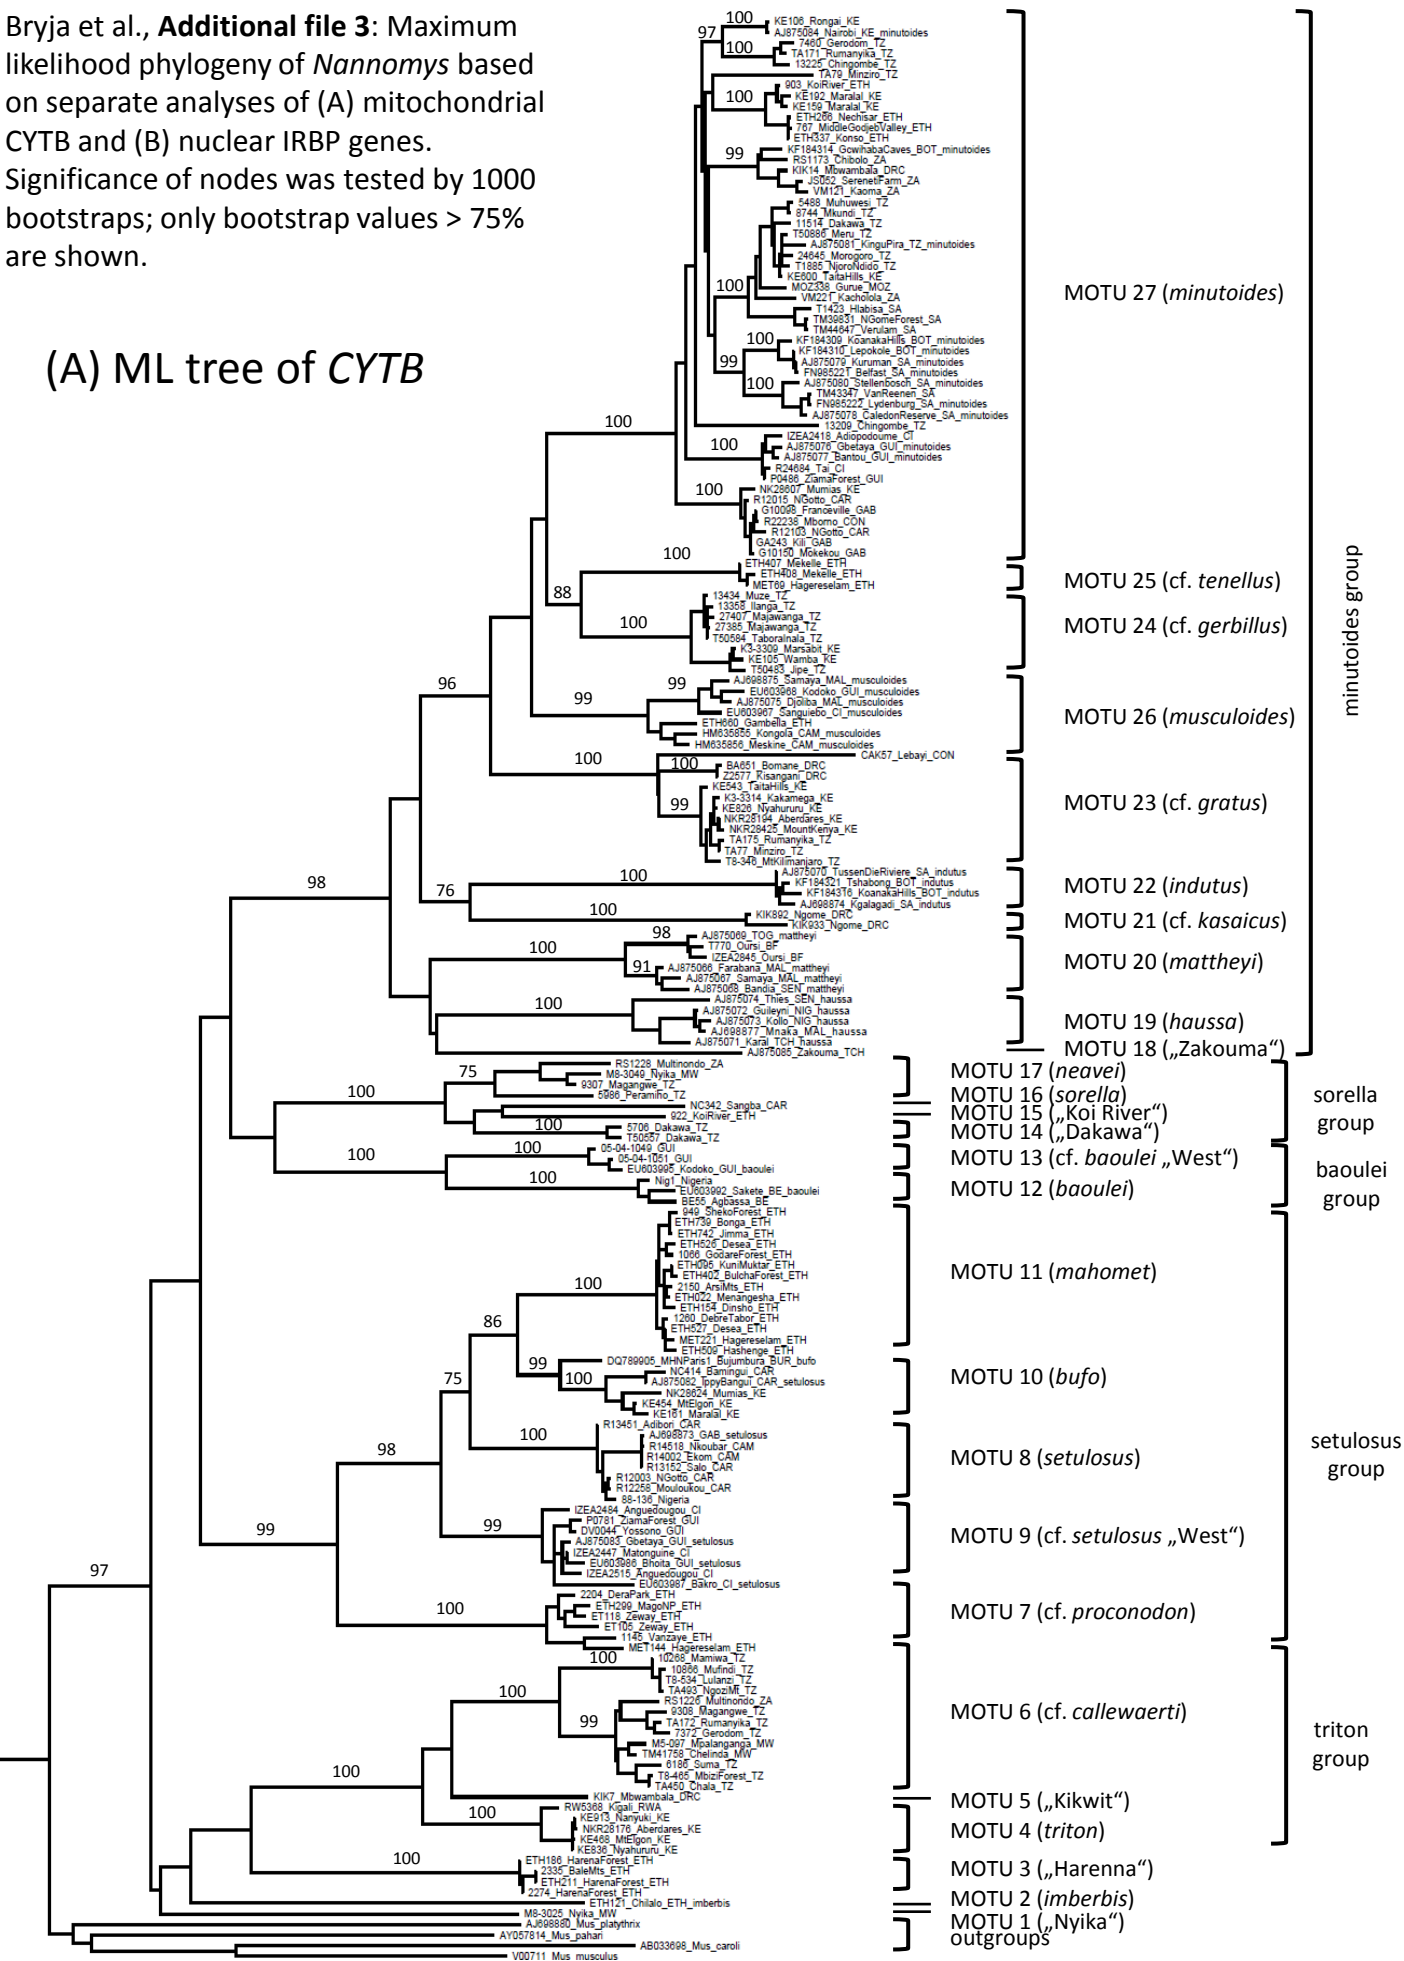

(B) ML tree of *IRBP*

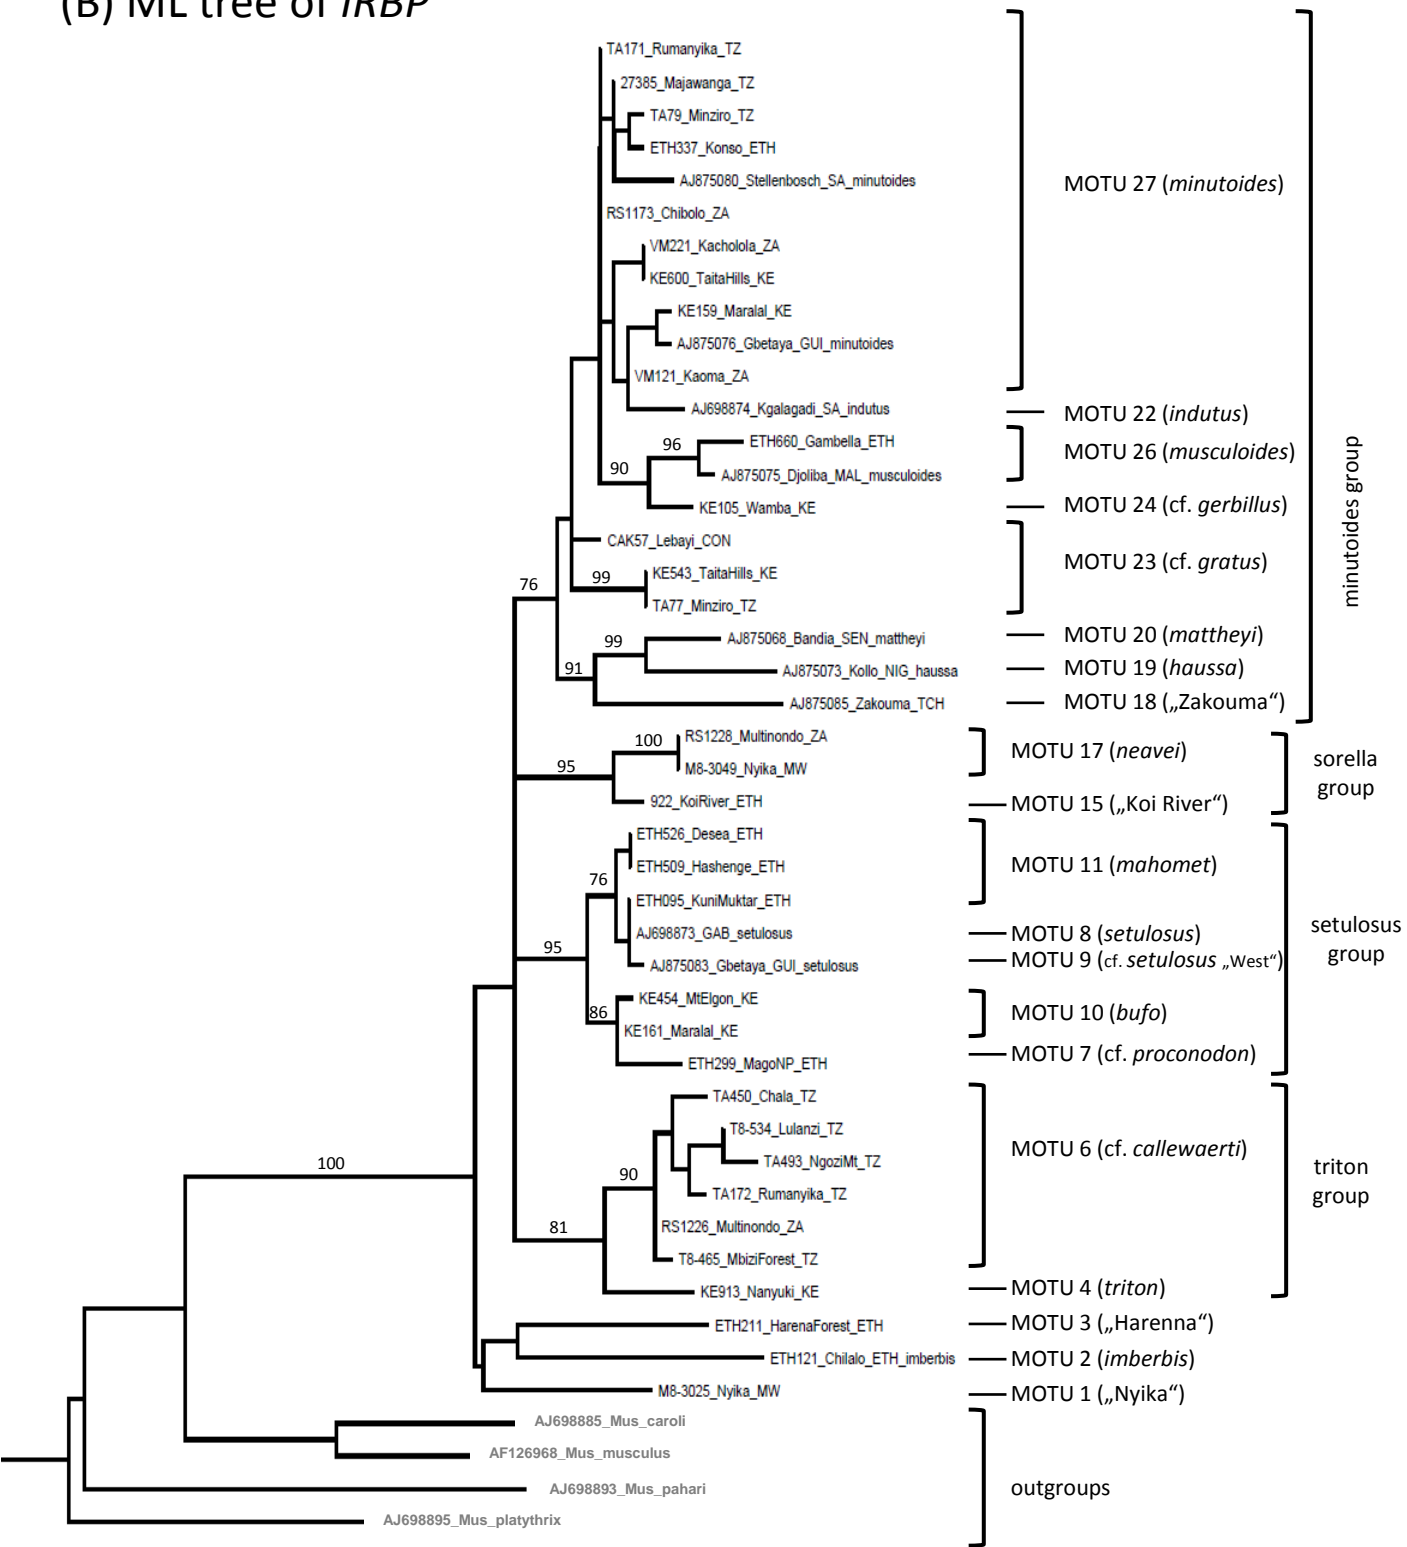

Supplement: 12862_2014_256_MOESM3_ESM.pdf [file 12862_2014_256_MOESM3_ESM.pdf]
