# Supplementary material for: Pan-African phylogeny of Mus (subgenus Nannomys) reveals one of the most successful mammal radiations in Africa
Source: PubMed Central journal article supplement (PMC4280006; doi:10.1186/s12862-014-0256-2), 2014-12-14

Bryja et al., **Additional file 4**: Distribution of K2-P distances within and among (a) GMYC-defined „species“ and (b) 27 MOTUs defined by the combination of genetic distances and geographic distribution (see the text for more details). Box-and-Whisker plots represent the median, range and quartiles of the mean K2-P distances within and between particular taxa.

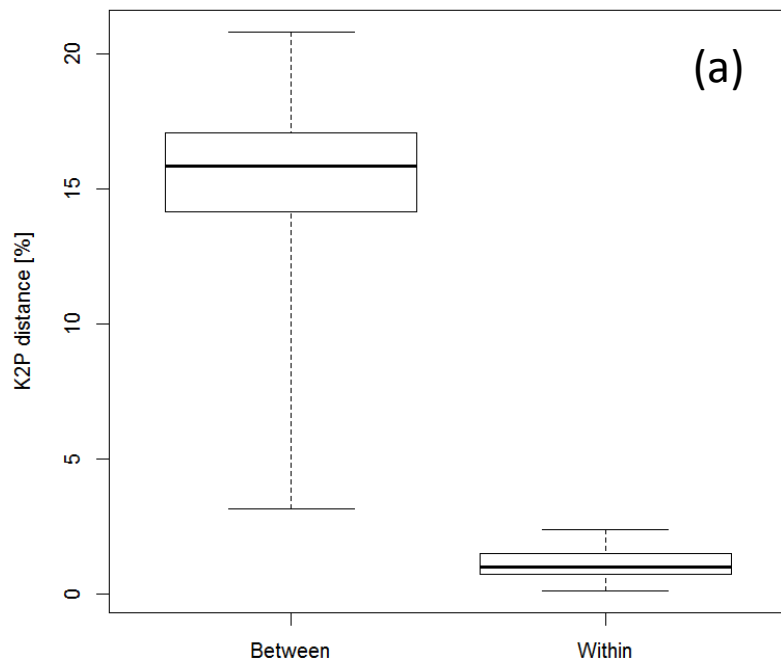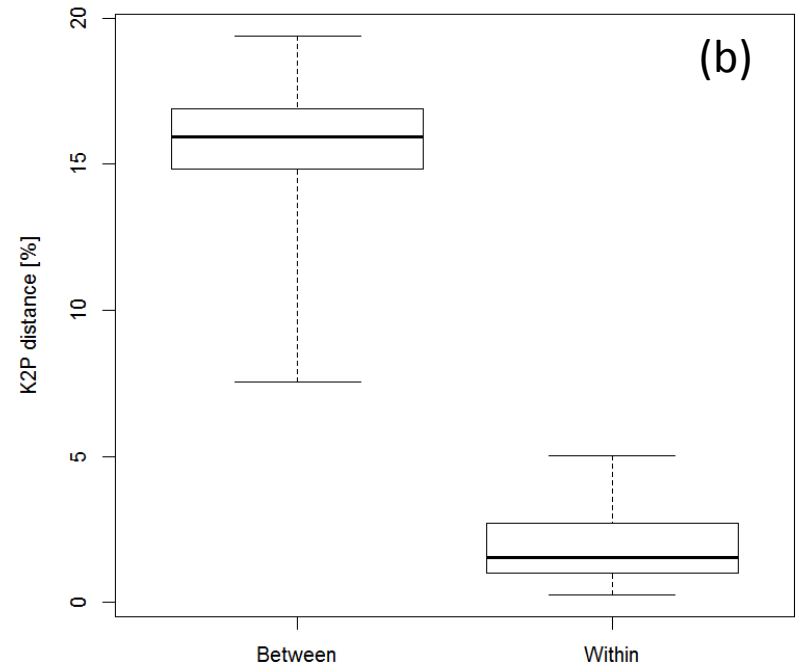

Supplement: 12862_2014_256_MOESM4_ESM.pdf [file 12862_2014_256_MOESM4_ESM.pdf]
